# Supplementary material for: Oxygen reactions on Pt{hkl} in a non-aqueous Na+ electrolyte: site selective stabilisation of a sodium peroxy species
Source: PubMed Central journal article supplement (PMC6427968; doi:10.1039/c8sc05489d), 2019-01-17
Supplement: SC-010-C8SC05489D-s001.pdf [file SC-010-C8SC05489D-s001.pdf]

*Supporting Information*

## **Oxygen reactions on Pt{hkl} in a non-aqueous Na<sup>+</sup> electrolyte: Site selective stabilisation of a sodium peroxy species**

Thomas A. Galloway<sup>[a]</sup>, Jin-Chao Dong<sup>[c]</sup>, Jian-Feng Li<sup>[c]</sup>, Gary Attard<sup>[b]</sup>

and Laurence J. Hardwick\* <sup>[a]</sup>

[\\*hardwick@liverpool.ac.uk](mailto:hardwick@liverpool.ac.uk)

[a] Stephenson Institute for Renewable Energy, Department of Chemistry, University of Liverpool, Liverpool, L69 7ZD (UK)

[b] Department of Physics, University of Liverpool, Liverpool, L69 7ZD (UK)

[c] State Key Laboratory of Physical Chemistry and Solid Surfaces, University of Xiamen (China)



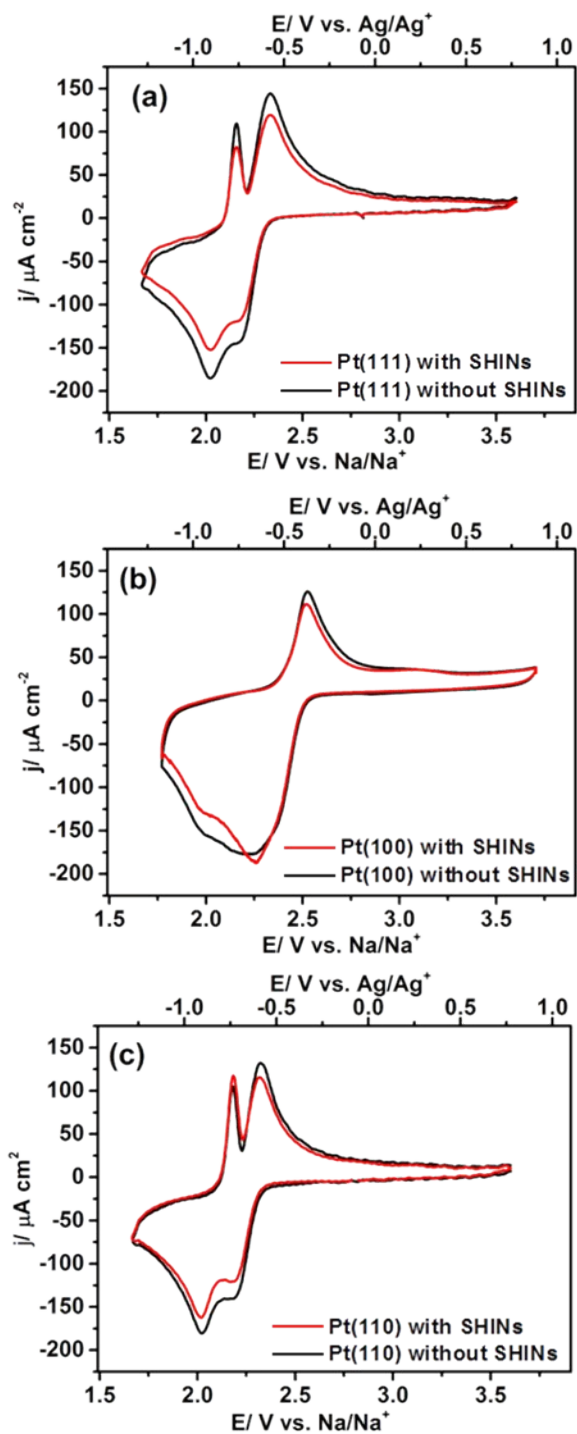

**Figure S1.** CVs of 0.1 M NaClO<sub>4</sub> in DMSO on different Pt single crystal facets with SHINS (red) and without SHINS (black) on (a) Pt {111}, (b) Pt {100} (c) Pt {110}. Sweep rate 50 mV/s.

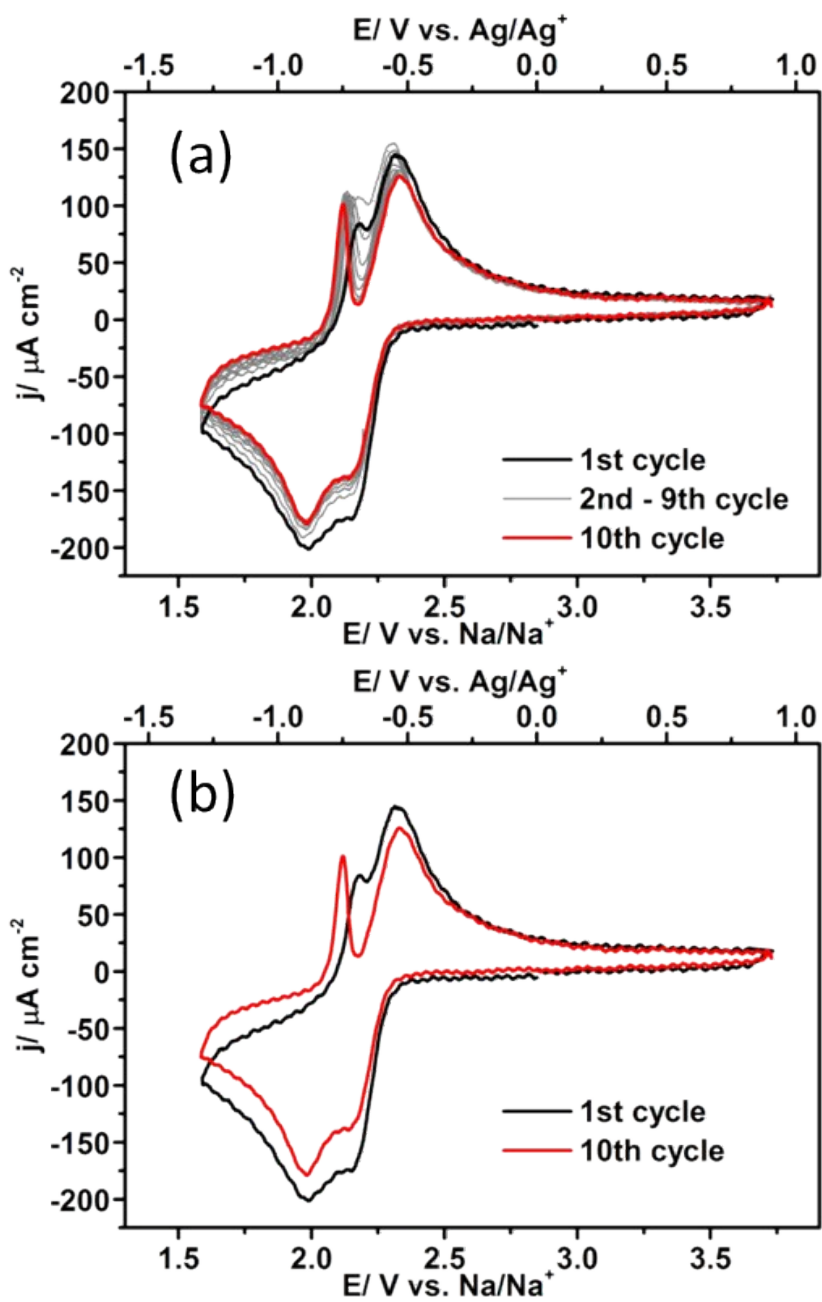

**Figure S2** (a) CVs of 0.1 M NaClO<sub>4</sub> in DMSO (saturated with O<sub>2</sub>) on Pt(111) 10 cycles, (b) CV showing 1<sup>st</sup> and 10<sup>th</sup> cycle. Sweep rate 50 mV/s.

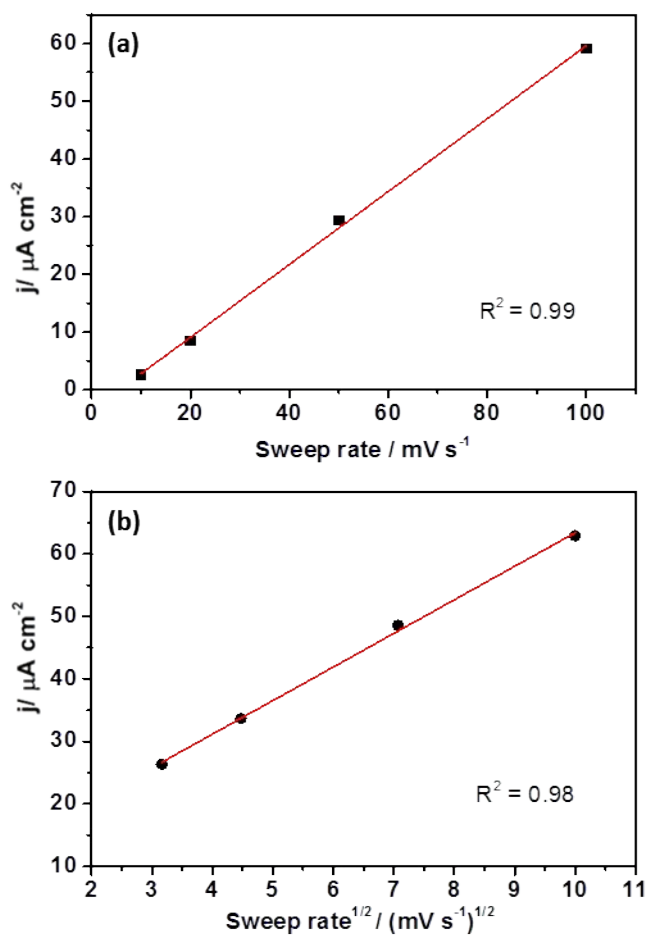

**Figure S3.** Plots of CV peak intensities as shown in Figure 5a for (a) 1<sup>st</sup> oxidation peak vs. sweep rate, (b) 2<sup>nd</sup> oxidation peak vs. sweep rate<sup>1/2</sup>. Data taken from CVs of 0.1 M NaClO<sub>4</sub> on Pt{111} (Figure 5a).

Using equation 14.3.12 from Bard and Faulkner<sup>1</sup> (Eq. S1), the relationship between peak current and sweep rate for an adsorbed species.

Eq. S1 
$$i_p = \frac{n^2 F^2 v \Gamma_o^*}{4RT}$$

Eq. S2 
$$Q^* = nF\Gamma_o^* = \text{total adsorption charge}$$

Eq. S3

$$i_p = \frac{nFvQ^*}{4RT}$$

Gradient (m) from plot  $i_p$  vs.  $v$  is

Eq. S4

$$m = \frac{nFQ^*}{4RT}$$

Therefore  $n$  can be calculated using the gradient from Figure S3a =  $6.3 \times 10^{-2} \text{ CV}^{-1}\text{cm}^{-2}$ ,  $Q^*$  ( $\text{C cm}^{-2}$ ) (calculated from Figure 6a,  $Q^* = 76 \mu\text{C cm}^{-2}$ ),  $F$  is Faraday's constant ( $96485 \text{ C mol}^{-1}$ ),  $R$  is the molar gas constant ( $8.314 \text{ J mol}^{-1} \text{ K}^{-1}$ ) and  $T$  the temperature ( $293 \text{ K}$ ).

$n = 0.851$ , this correlates to approximately a 1  $e^-$  transfer process occurring at the surface for the 1<sup>st</sup> oxidation peak, in agreement with the oxidation of  $\text{Na}_2\text{O}_2$  to  $\text{NaO}_2$ .

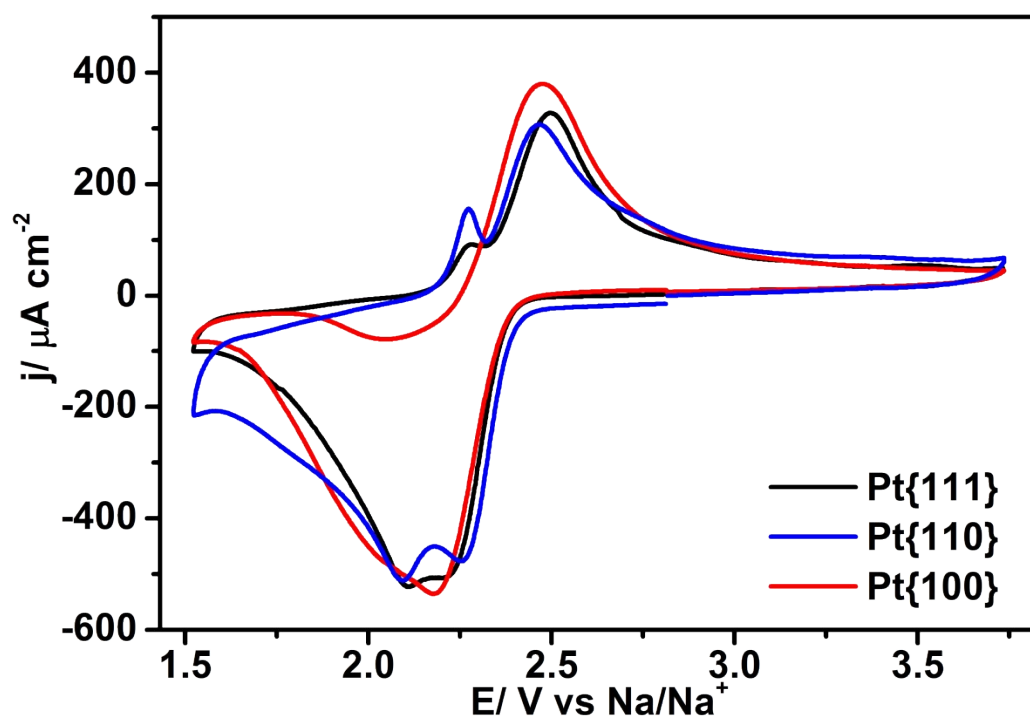

Fi

Figure S4. CVs of 0.1 M NaTFSI in DMSO on different Pt single crystal facets. Sweep rate 50 mV/s.

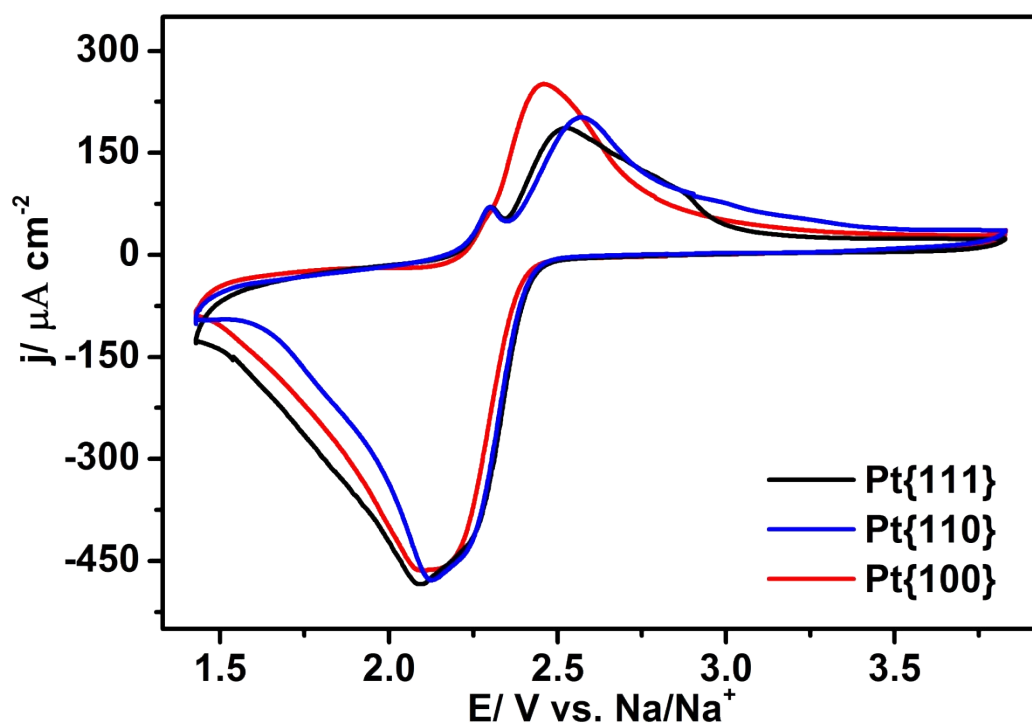

Fi

**Figure S5.** CVs of 0.1 M NaOTf in DMSO on different Pt single crystal facets. Sweep rate 50 mV/s.

Figures S2 and S4-S5 demonstrate that the ORR occurring on the platinum single crystal facets are independent of the Na salt used, providing the anion is stable in the presence of superoxide species and does not degrade on the platinum surface. The use of sodium OTf and sodium TFSI as alternative anions produced a similar electrochemical trend to that of perchlorate. A sharp initial oxidation peak was observed on the Pt{111} and Pt{110} surfaces. The Pt{100} surface only displayed a single oxidation peak in agreement with the perchlorate data. Figure S6 demonstrates that the same reaction mechanism also occurs in an alternative solvent. However the solvents suitable for use on Pt are limited (Figure S7).



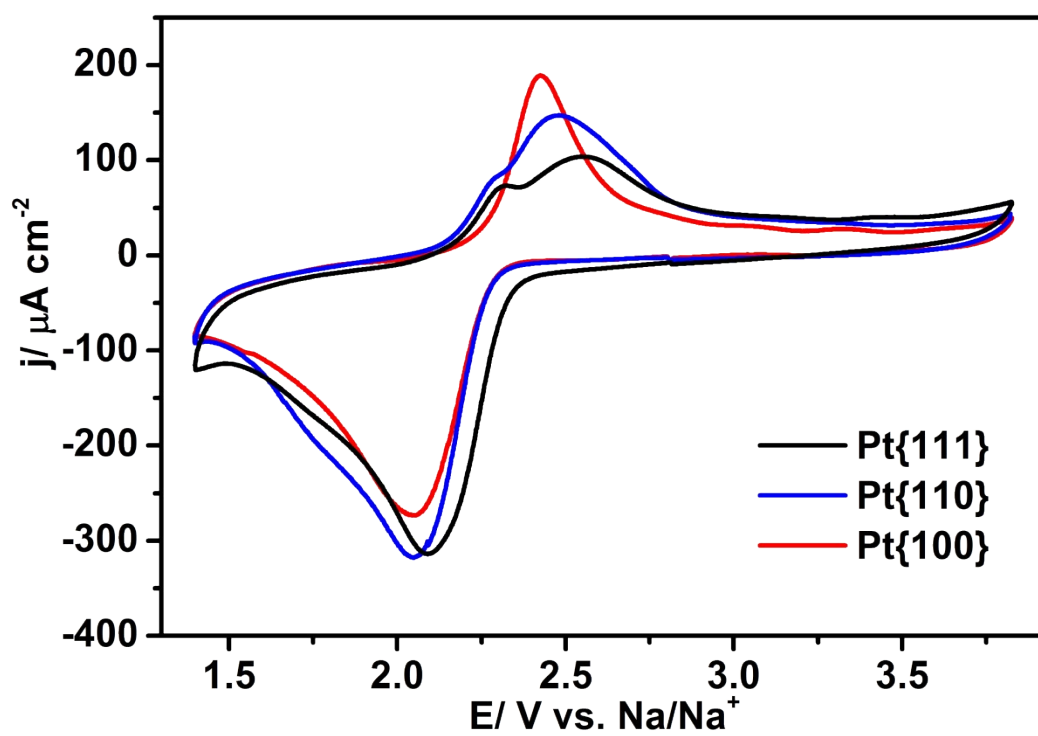

**Figure S6.** CVs of 0.1 M NaOTF in DMSO/ sulpholane electrolyte blend (2:1) on different Pt single crystal facets. Sweep rate 50 mV/s.

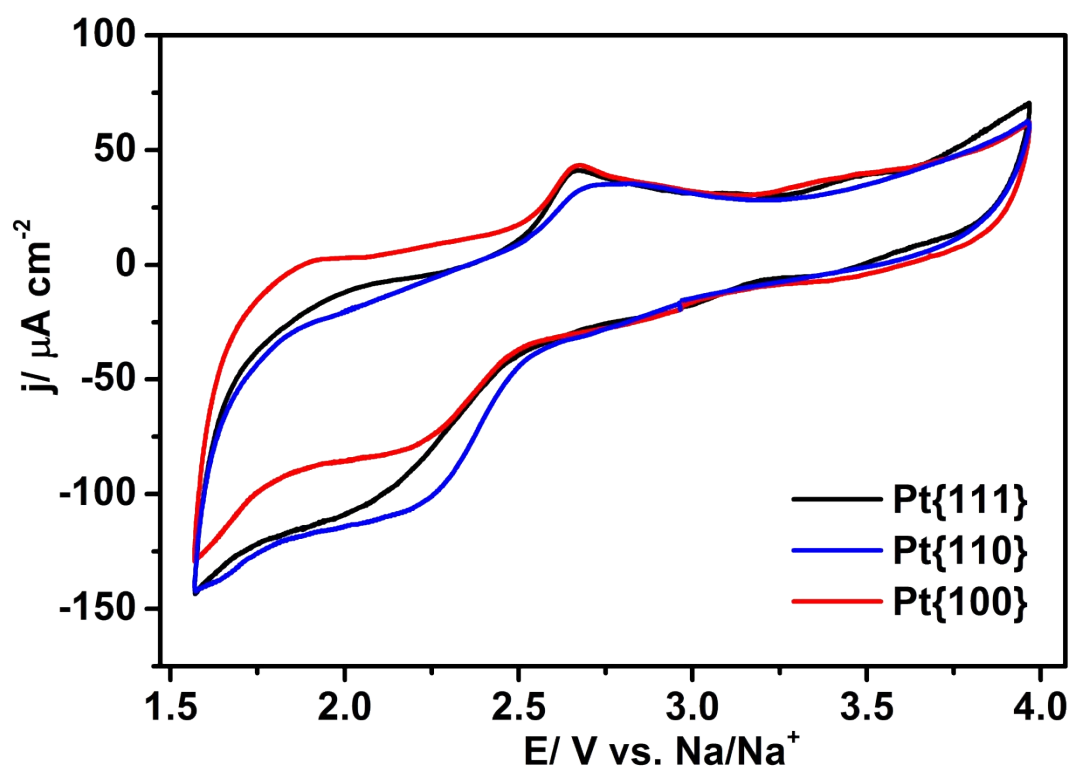

**Figure S7.** CVs of 0.1 M NaClO<sub>4</sub> in MeCN on different Pt single crystal facets. Sweep rate 50 mV/s.

Figure S7 illustrates the importance of the stability of the interface on the oxygen reduction reaction (ORR). Acetonitrile is well documented to form a blocking layer on the electrode surface,<sup>2,3</sup> passivating the ORR at the electrode surface which is dependent on free surface Pt sites.

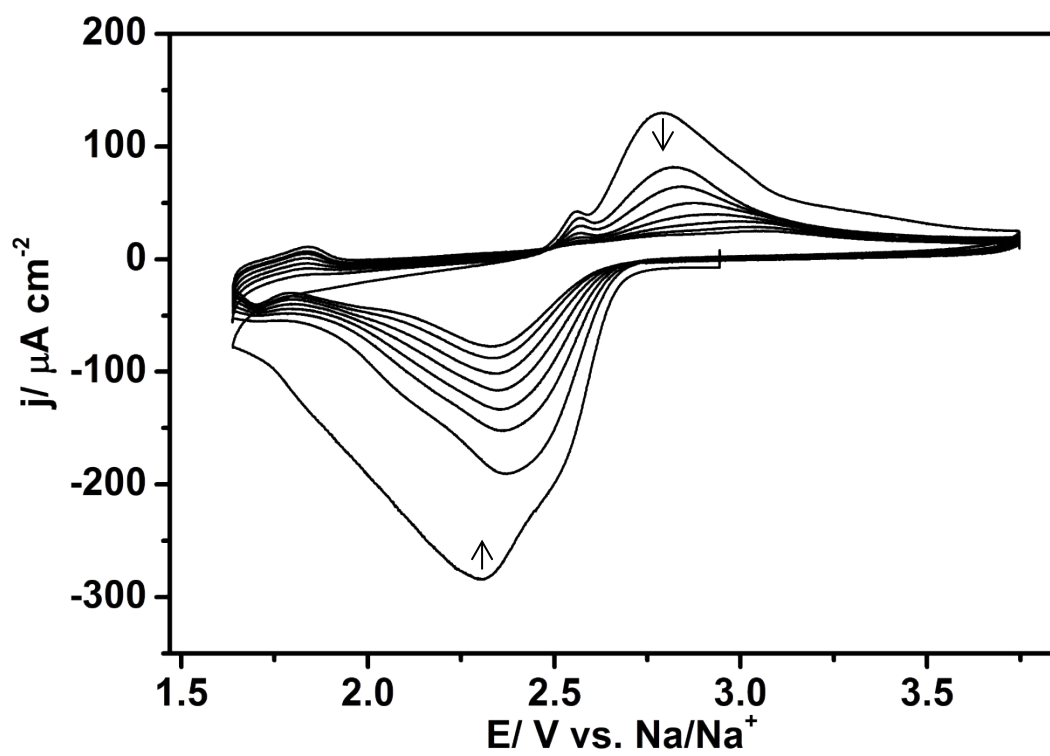

F

figure S8. CV of 1 mM NaBr in 0.1 M NaClO<sub>4</sub>/DMSO on Pt{110}. Sweep rate 50 mV/s.

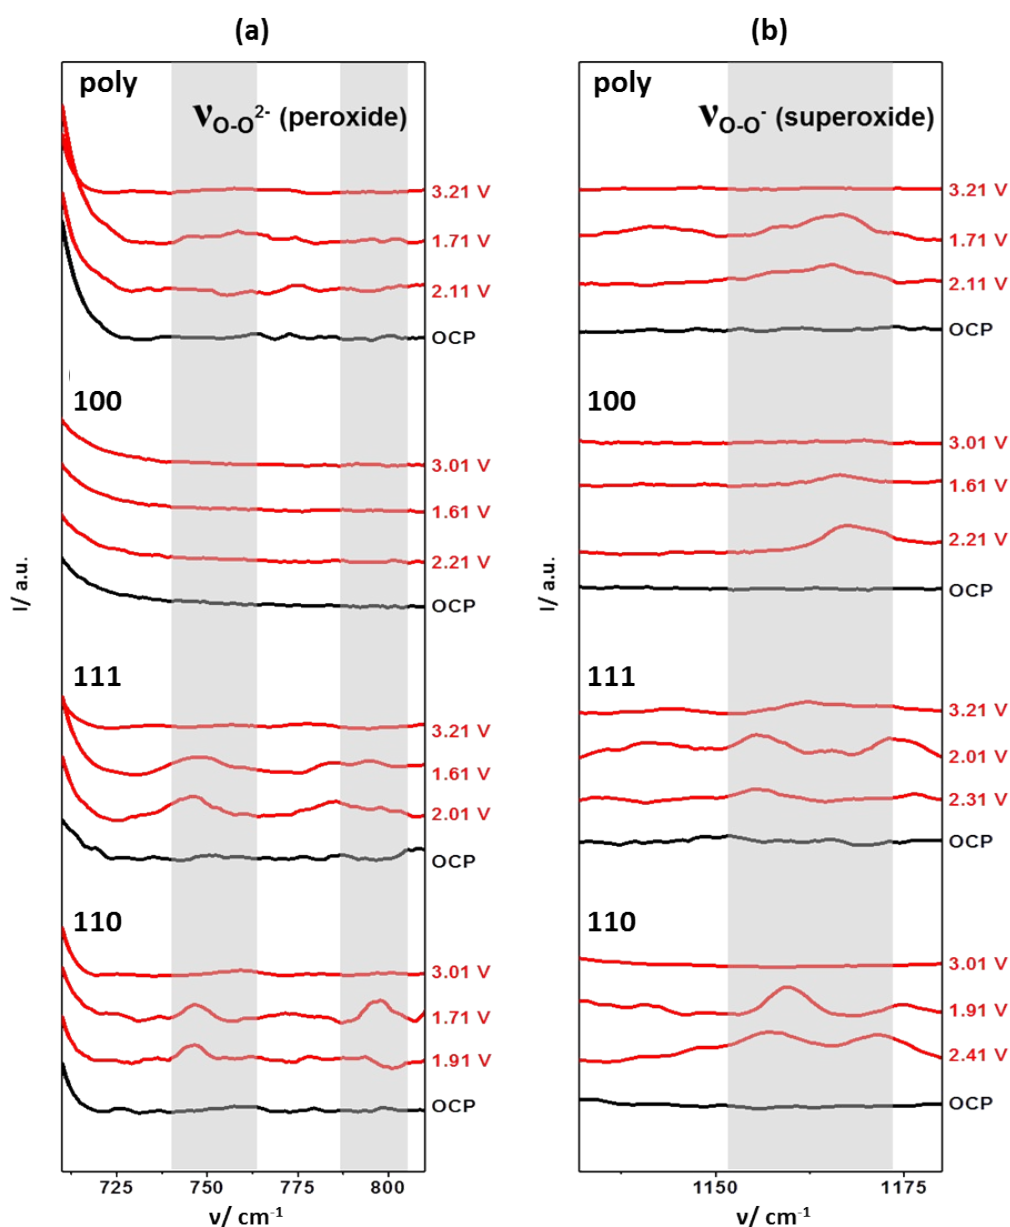

**Figure S9.** EC-SHINERS of 0.1 M NaClO<sub>4</sub> in DMSO on Pt poly, Pt{100},Pt{111} and Pt{110} (a) peroxide vibrational modes region (b) superoxide vibrational modes region . All surfaces prepared by flame-annealing and cooling in a CO/water gas stream, then protected using an irreversibly adsorbed Br<sup>-</sup> monolayer before addition of SHINs nanoparticles. OCP was 2.8 V. (Key band assignment available in supplementary information **Table S3**).

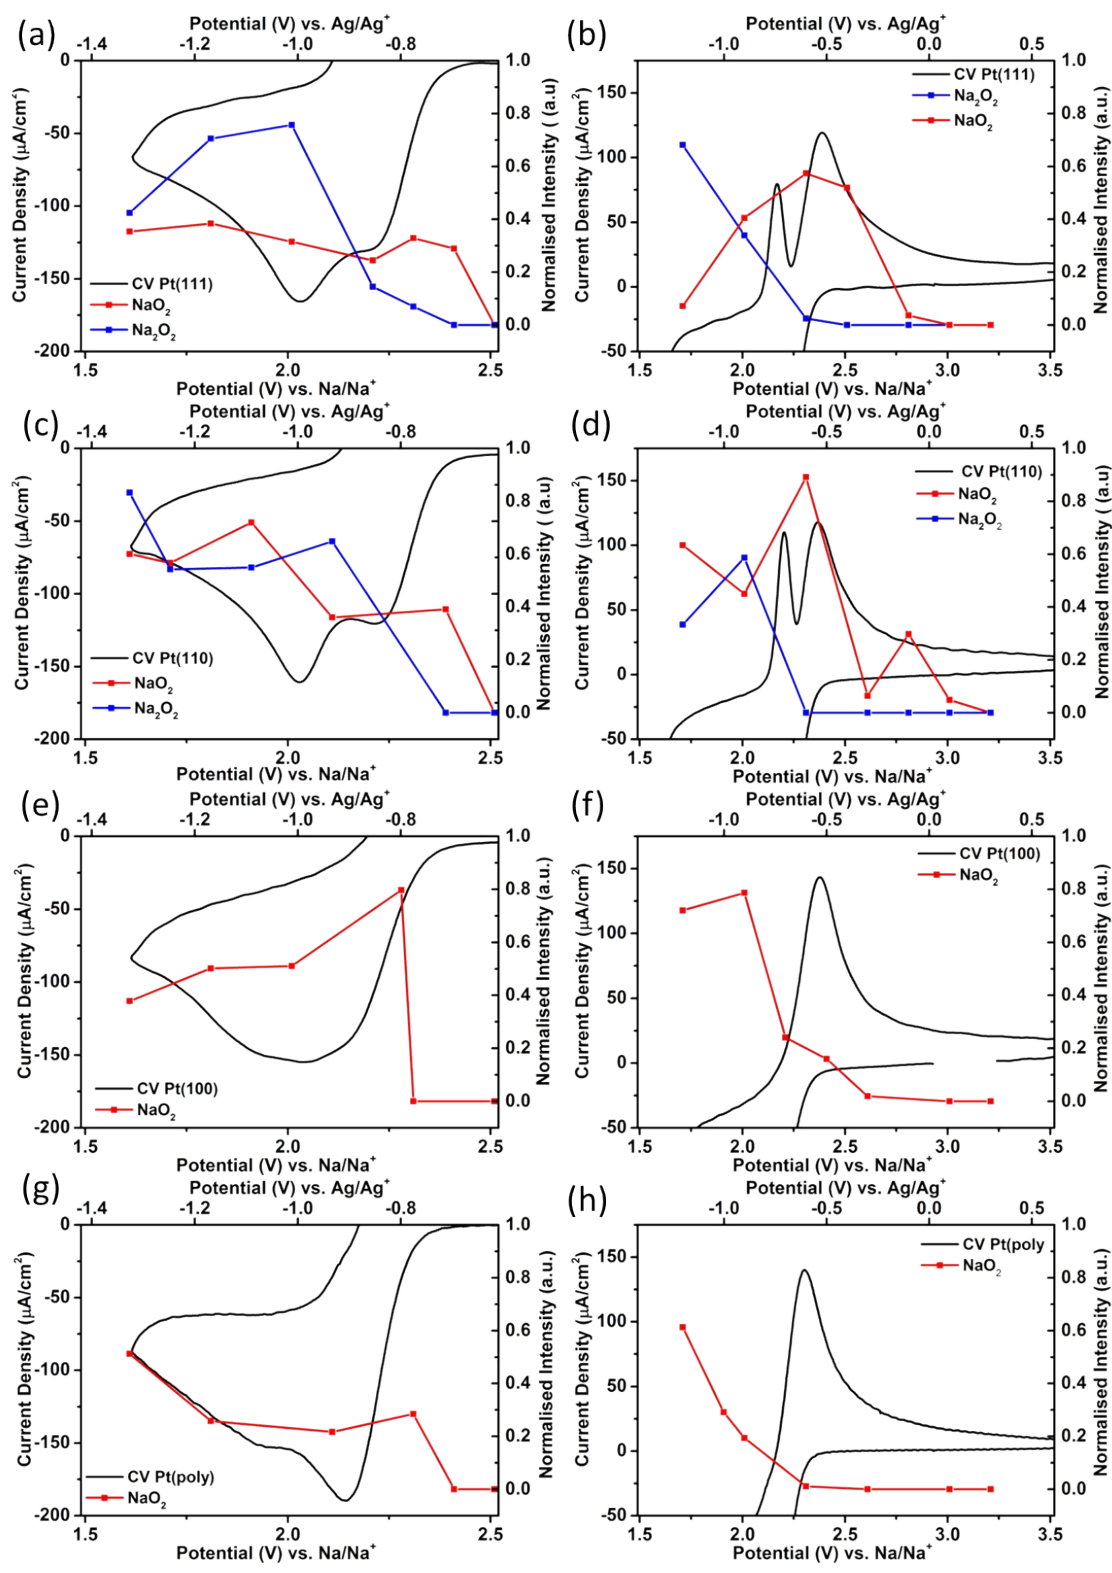

**Figure S10.** CVs with Raman intensities of  $\nu$ O-O of  $\text{NaO}_2$  ( $1158\text{cm}^{-1}$ ) and  $\text{Na}_2\text{O}_2$  ( $740\text{cm}^{-1}$ ) in 0.1 M  $\text{NaClO}_4/\text{DMSO}$  on (a,b) Pt{111}, (c, d) {110}, (e,f) {100} and (g,h) poly. (a,c,e,g reduction Raman intensities and b,d,f,h oxidation Raman intensities)

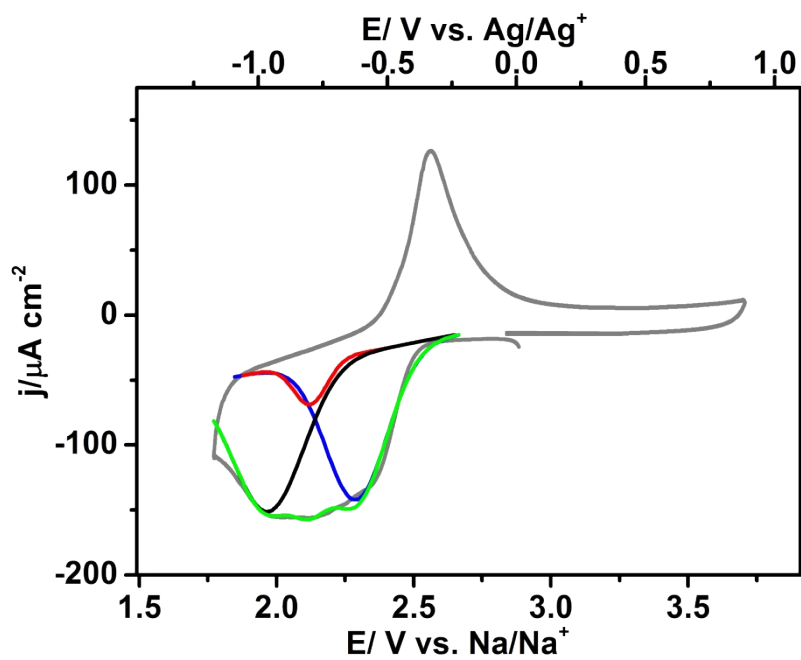

**Figure S11.** Peak fitting of 0.1 M NaClO<sub>4</sub> in DMSO on Pt{100}. Sweep rate 100 mV/s. The blue curve corresponds to sodium superoxide formation, the red curve to sodium peroxide and the black curve to superoxide formed from oxygen reduction on sodium superoxide covered platinum sites.

**Table S1.** Theoretical Specific Energies for Na-O<sub>2</sub>

| <b>Battery (theoretical values)</b>                   | <b><math>\Delta G/ \text{kJ mol}^{-1}</math></b> | <b>Potential/ V</b> | <b>Specific Energy/ Wh kg<sup>-1</sup></b> |
|-------------------------------------------------------|--------------------------------------------------|---------------------|--------------------------------------------|
| Na-O <sub>2</sub> (non-aq):                           |                                                  |                     |                                            |
| Na + O <sub>2</sub> = NaO <sub>2</sub>                | - 218.4                                          | 2.27                | 1106                                       |
| 2Na + O <sub>2</sub> = Na <sub>2</sub> O <sub>2</sub> | - 449.7                                          | 2.33                | 1601                                       |

The theoretical specific energy for the reaction to form the peroxide (Na<sub>2</sub>O<sub>2</sub>) involving a 2 electron reduction is greater (1601 Wh kg<sup>-1</sup>) than to the formation of the superoxide (NaO<sub>2</sub>) via a 1 electron reduction (1106 Wh kg<sup>-1</sup>). Values in table calculated directly from open source thermodynamic data.

**Table S2.** Corresponding peak positions of 0.1 M NaClO<sub>4</sub> in DMSO on different Pt single crystal facets from Figure 2a and CV data from Figures S1 and S4-S7. Potentials vs. Na/Na<sup>+</sup>.

| Electrode/ Electrolyte                |          | Redox peaks observed in CVs |                  |                   |                   |
|---------------------------------------|----------|-----------------------------|------------------|-------------------|-------------------|
|                                       |          | Ep <sup>r1</sup>            | Ep <sup>r2</sup> | Ep <sup>ox1</sup> | Ep <sup>ox2</sup> |
| 0.1 M<br>NaClO <sub>4</sub> /<br>DMSO | Pt{111}  | 2.20 V                      | 2.01 V           | 2.16 V            | 2.37 V            |
|                                       | Pt{110}  | 2.21 V                      | 2.02 V           | 2.19 V            | 2.39 V            |
|                                       | Pt{100}  | 2.02 V (broad)              |                  | -                 | 2.34 V            |
|                                       | Pt{poly} | 2.12 V                      | 1.95 V           | -                 | 2.29 V            |
| 0.1 M<br>NaTFSI/<br>DMSO              | Pt{111}  | 2.22 V                      | 2.10 V           | 2.27 V            | 2.49 V            |
|                                       | Pt{110}  | 2.25                        | 2.08 V           | 2.28 V            | 2.46 V            |
|                                       | Pt{100}  | 2.17 V                      | 2.02 V           | -                 | 2.49 V            |
| 0.1 M<br>NaOTF/<br>DMSO               | Pt{111}  | 2.23 V                      | 2.08 V           | 2.28 V            | 2.50 V            |
|                                       | Pt{110}  | 2.24 V                      | 2.10 V           | 2.28 V            | 2.53 V            |
|                                       | Pt{100}  | 2.19 V                      | 2.08 V           | -                 | 2.43 V            |
| 0.1 M<br>NaOTF/<br>2D:1S*             | Pt{111}  | 2.10 V                      | 1.79 V           | 2.30 V            | 2.54 V            |
|                                       | Pt{110}  | 2.04 V                      | 1.76 V           | 2.28 V            | 2.47 V            |
|                                       | Pt{100}  | 2.05 V (broad)              |                  | -                 | 2.42 V            |
| 0.1 M<br>NaClO <sub>4</sub> /<br>MeCN | Pt{111}  | 2.14 V                      | -                | -                 | 2.65 V            |
|                                       | Pt{110}  | 2.22 V                      | -                | -                 | 2.70 V            |
|                                       | Pt{100}  | 2.19 V                      | -                | -                 | 2.66 V            |

\*2D:1S is DMSO: sulfolane (2:1v/v ratio).



**Table S3.** Corresponding Raman peak positions (cm<sup>-1</sup>) of 0.1 M NaClO<sub>4</sub> in DMSO on different Pt single crystal facets from Figure 3 and Figure 4.

| Band Assignment                               | Pt(111) | Pt(110) | Pt(100) | Pt(poly) | Literature                          |
|-----------------------------------------------|---------|---------|---------|----------|-------------------------------------|
| $\nu_{\text{O-O}}(\text{O}_2^-)_{\text{ads}}$ | 1107    | 1105    | 1115    | 1115     | 1109 <sup>4</sup> 1108 <sup>5</sup> |
| $\nu_{\text{O-O}}(\text{NaO}_2)_{\text{ads}}$ | 1154    | 1158    | 1162    | 1162     | 1156 <sup>6,7</sup>                 |
| $\nu_{\text{O-O}}(\text{Na}_2\text{O}_2)$     | 740     | 742     | -       | -        | 736 <sup>4</sup>                    |
|                                               | 798     | 798     | -       | -        | 791 <sup>8</sup>                    |
| $\nu_{\text{Cl-O}}(\text{NaClO}_4)$           | 930     | 930     | 930     | 930      | 935 <sup>9</sup>                    |
| $\nu_{\text{CH}_3(\text{rock})}(\text{DMSO})$ | 955     | 955     | 955     | 955      | 1050 <sup>10</sup>                  |
| $\nu_{\text{S=O}}(\text{DMSO})$               | 1044    | 1044    | 1044    | 1044     |                                     |
| $\nu_{\text{O-O}}(\text{NaO}_2\text{H})$      | 824     | 824     | -       | -        | 836 <sup>8</sup>                    |
| $\nu_{\text{O-O}}(\text{H}_2\text{O}_2)$      | 874     | 874     | -       | -        | 875 <sup>11</sup> 867 <sup>12</sup> |
| $\nu_{\text{O-O}}(\text{HO}_2)_{\text{ads}}$  | 1190    | 1190    | 1200    | 1200     | 1103 <sup>13*</sup>                 |
|                                               |         |         |         |          | 1165 <sup>14</sup>                  |

\*Limited literature data for presence of HO<sub>2</sub>, wavenumber recorded at 14 K under UHV conditions

**Table S4.** Corresponding peak positions ( $\text{cm}^{-1}$ ) and fitting data of 0.1 M  $\text{NaClO}_4$  in DMSO on different Pt single crystal facets from Figure S11.

| Peak  | Peak centre (V vs. Na/Na <sup>+</sup> ) | Peak Type | Area | % total peak area | FWHM |
|-------|-----------------------------------------|-----------|------|-------------------|------|
| blue  | 2.26                                    | Gaussian  | 31.4 | 46.2              | 0.32 |
| red   | 2.08                                    | Gaussian  | 4.8  | 7.1               | 0.17 |
| black | 1.86                                    | Gaussian  | 32.1 | 47.2              | 0.37 |

## References

1. A. Bard and L. Faulkner, *Electrochemical methods: Fundamentals and applications*, John Wiley & sons, Inc., New York, 2001.
2. P. Cao and Y. Sun, *J. Phys. Chem. B*, 2003, **107**, 5818-5824.
3. Z. Deng and D. E. Irish, *J. Phys. Chem. C*, 1994, **98**, 9371-9373.
4. Z. Peng, S. A. Freunberger, L. J. Hardwick, Y. Chen, V. Giordani, F. Barde, P. Novak, D. Graham, J.-M. Tarascon and P. G. Bruce, *Angew. Chem., Int. Ed.*, 2011, **50**, 6351-6355.
5. T. A. Galloway and L. J. Hardwick, *J. Phys. Chem. Lett.*, 2016, **7**, 2119-2124.
6. I. M. Aldous and L. J. Hardwick, *Angew. Chem., Int. Ed.*, 2016, **55**, 8254-8257.
7. N. Ortiz-Vitoriano, T. P. Batcho, D. G. Kwabi, B. Han, N. Pour, K. P. C. Yao, C. V. Thompson and Y. Shao-Horn, *J. Phys. Chem. Lett.*, 2015, **6**, 2636-2643.
8. H. H. Eysel and S. Thym, *Z. Anorg. Allg. Chem.*, 1975, **411**, 97-102.
9. M. I. S. Sastry and S. Singh, *Can. J. Chem.*, 1985, **63**, 1351-1356.
10. W. N. Martens, R. L. Frost, J. Kristof and J. Theo Kloprogge, *J. Raman Spectrosc.*, 2002, **33**, 84-91.
11. S. Venkateswaran, *Nature*, 1931, **127**, 406.
12. P. A. Giguère and T. K. K. Srinivasan, *J. Raman Spec.*, 1974, **2**, 125-132.
13. M. E. Jacox and D. E. Milligan, *J. Mol. Spectrosc.*, 1972, **42**, 495-513.
14. X. Li and A. A. Gewirth, *J. Am. Chem. Soc.*, 2005, **127**, 5252-5260.
